# Supplementary material for: Global Association of COVID-19 Pandemic Measures with Cancer Treatment: A Systematic Review and Meta-Analysis
Source: MDPI journal article supplement (doi:10.3390/cancers14225490), 2022-11-08
Supplement: s1 [file s1]

## Supplementary Materials

**Supplementary Table S1** Characteristics of studies selected for cancer treatment

| Ref. | Country | Contrast period                     | Period on exam                   | Site of cancer    | Setting and database                                                                                                             | Quality assessment score |
|------|---------|-------------------------------------|----------------------------------|-------------------|----------------------------------------------------------------------------------------------------------------------------------|--------------------------|
| (1)  | Turkey  | March 10, 2019 – May 10, 2019       | March 10, 2020 – May 10, 2020    | Miscellaneous     | Hospital Registration System of Istanbul University, Institute of Oncology                                                       | 10                       |
| (2)  | Turkey  | March 15, 2019 – June 1, 2019       | March 15, 2020 – June 1, 2020    | Miscellaneous     | Ankara City Hospital, Ankara Diskapi Yildirim Beyazit Training and Research Hospital, and Gulhane Training and Research Hospital | 10                       |
|      | Turkey  | March 15, 2019 – June 1, 2019       | March 15, 2020 – June 1, 2020    | Miscellaneous     | Ankara City Hospital, Ankara Diskapi Yildirim Beyazit Training and Research Hospital, and Gulhane Training and Research Hospital |                          |
| (3)  | India   | January 1, 2020 – January 31, 2020  | March 1, 2020 – March 31, 2020   | Colorectal        | Hospital register                                                                                                                | 9.5                      |
|      | India   | January 1, 2020 – January 31, 2020  | April 1, 2020 – April 30, 2020   | Colorectal        | Hospital register                                                                                                                | 9.5                      |
|      | India   | January 1, 2020 – January 31, 2020  | May 1, 2020 – May 31, 2020       | Colorectal        | Hospital register                                                                                                                | 9.5                      |
|      | India   | January 1, 2020 – January 31, 2020  | March 1, 2020 – March 31, 2020   | Colorectal        | Hospital register                                                                                                                | 9.5                      |
|      | India   | January 1, 2020 – January 31, 2020  | April 1, 2020 – April 30, 2020   | Colorectal        | Hospital register                                                                                                                | 9.5                      |
|      | India   | January 1, 2020 – January 31, 2020  | May 1, 2020 – May 31, 2020       | Colorectal        | Hospital register                                                                                                                | 9.5                      |
|      | India   | January 1, 2020 – January 31, 2020  | March 1, 2020 – March 31, 2020   | Colorectal        | Hospital register                                                                                                                | 9.5                      |
|      | India   | January 1, 2020 – January 31, 2020  | April 1, 2020 – April 30, 2020   | Colorectal        | Hospital register                                                                                                                | 9.5                      |
|      | India   | January 1, 2020 – January 31, 2020  | May 1, 2020 – May 31, 2020       | Colorectal        | Hospital register                                                                                                                | 9.5                      |
| (4)  | USA     | January 1, 2020 – February 29, 2020 | March 1, 2020 – April 30, 2020   | Miscellaneous*    | Rutgers Cancer Institute of New Jersey                                                                                           | 10                       |
|      | USA     | January 1, 2020 – February 29, 2020 | March 1, 2020 – April 30, 2020   | Gynecologic*      | Rutgers Cancer Institute of New Jersey                                                                                           | 10                       |
|      | USA     | January 1, 2020 – February 29, 2020 | March 1, 2020 – April 30, 2020   | Gastrointestinal* | Rutgers Cancer Institute of New Jersey                                                                                           | 10                       |
|      | USA     | January 1, 2020 – February 29, 2020 | March 1, 2020 – April 30, 2020   | Melanoma*         | Rutgers Cancer Institute of New Jersey                                                                                           | 10                       |
|      | USA     | January 1, 2020 – February 29, 2020 | March 1, 2020 – April 30, 2020   | Breast*           | Rutgers Cancer Institute of New Jersey                                                                                           | 10                       |
| (5)  | Canada  | March 13, 2019 – August 10, 2019    | March 13, 2020 – August 10, 2020 | Gastrointestinal  | Electronic Health record (EHR) database                                                                                          | 10                       |
|      | Canada  | March 13, 2019 – August 10, 2019    | March 13, 2020 – August 10, 2020 | Gynecologic       | Electronic Health record (EHR) database                                                                                          | 10                       |

|     |        |                                     |                                    |                    |                                                                             |     |
|-----|--------|-------------------------------------|------------------------------------|--------------------|-----------------------------------------------------------------------------|-----|
|     | Canada | March 13, 2019 – August 10, 2019    | March 13, 2020 – August 10, 2020   | Hematologic cancer | Electronic Health record (EHR) database                                     | 10  |
|     | Canada | March 13, 2019 – August 10, 2019    | March 13, 2020 – August 10, 2020   | Head and neck      | Electronic Health record (EHR) database                                     | 10  |
|     | Canada | March 13, 2019 – August 10, 2019    | March 13, 2020 – August 10, 2020   | Skin cancer        | Electronic Health record (EHR) database                                     | 10  |
|     | Canada | March 13, 2019 – August 10, 2019    | March 13, 2020 – August 10, 2020   | Miscellaneous      | Electronic Health record (EHR) database                                     | 10  |
|     | Canada | March 13, 2019 – August 10, 2019    | March 13, 2020 – August 10, 2020   | Lung               | Electronic Health record (EHR) database                                     | 10  |
|     | Canada | March 13, 2019 – August 10, 2019    | March 13, 2020 – August 10, 2020   | Prostate           | Electronic Health record (EHR) database                                     | 10  |
|     | Canada | March 13, 2019 – August 10, 2019    | March 13, 2020 – August 10, 2020   | CNS                | Electronic Health record (EHR) database                                     | 10  |
|     | Canada | March 13, 2019 – August 10, 2019    | March 13, 2020 – August 10, 2020   | Breast             | Electronic Health record (EHR) database                                     | 10  |
|     | Canada | March 13, 2019 – August 10, 2019    | March 13, 2020 – August 10, 2020   | Genito-urinary     | Electronic Health record (EHR) database                                     | 10  |
|     | Canada | March 13, 2019 – August 10, 2019    | March 13, 2020 – August 10, 2020   | Miscellaneous      | Electronic Health record (EHR) database                                     | 10  |
| (6) | France | January 1, 2019 – December 31, 2019 | March 16, 2020 – May 12, 2020      | Colorectal         | National database                                                           | 9   |
|     | France | January 1, 2020 – March 15, 2020    | March 16, 2020 – May 12, 2020      | Colorectal         | National database                                                           | 9   |
|     | France | May 13, 2020 – October 1, 2020      | March 16, 2020 – May 12, 2020      | Colorectal         | National database                                                           | 9   |
| (7) | Italy  | March 9, 2019 – April 15, 2019      | March 9, 2020 – April 15, 2020     | Colorectal         | Department of Surgery, University of Torino, Italy                          | 10  |
| (8) | India  | April 1, 2019 – September 30, 2019  | April 1, 2020 – September 30, 2020 | Miscellaneous      | Tertiary care surgical oncology department at an academic hospital in India | 9.5 |
|     | India  | April 1, 2019 – September 30, 2019  | April 1, 2020 – September 30, 2020 | Miscellaneous      | Tertiary care surgical oncology department at an academic hospital in India | 9.5 |

|      |        |                                    |                                    |                  |                                                                             |     |
|------|--------|------------------------------------|------------------------------------|------------------|-----------------------------------------------------------------------------|-----|
|      | India  | April 1, 2019 – September 30, 2019 | April 1, 2020 – September 30, 2020 | Head and neck    | Tertiary care surgical oncology department at an academic hospital in India | 9.5 |
|      | India  | April 1, 2019 – September 30, 2019 | April 1, 2020 – September 30, 2020 | Gastrointestinal | Tertiary care surgical oncology department at an academic hospital in India | 9.5 |
|      | India  | April 1, 2019 – September 30, 2019 | April 1, 2020 – September 30, 2020 | Genito-urinary   | Tertiary care surgical oncology department at an academic hospital in India | 9.5 |
|      | India  | April 1, 2019 – September 30, 2019 | April 1, 2020 – September 30, 2020 | Miscellaneous    | Tertiary care surgical oncology department at an academic hospital in India | 9.5 |
| (9)  | Canada | March 16, 2019 – April 30, 2019    | March 16, 2020 – April 30, 2020    | Breast           | Breast surgery database at Providence Breast Centre                         | 9.5 |
| (10) | India  | March 1, 2019 – May 31, 2019       | March 1, 2020 – May 31, 2020       | Miscellaneous    | National Cancer Grid of India                                               | 10  |
|      | India  | March 1, 2019 – May 31, 2019       | March 1, 2020 – May 31, 2020       | Miscellaneous    | National Cancer Grid of India                                               | 10  |
|      | India  | March 1, 2019 – May 31, 2019       | March 1, 2020 – May 31, 2020       | Miscellaneous    | National Cancer Grid of India                                               | 10  |
|      | India  | March 1, 2019 – May 31, 2019       | March 1, 2020 – May 31, 2020       | Miscellaneous    | National Cancer Grid of India                                               | 10  |
| (11) | USA    | March 1, 2019 – March 31, 2019     | March 1, 2020 – March 31, 2020     | Miscellaneous*   | Proprietary provider clearinghouse registry                                 | 9.5 |
|      | USA    | March 1, 2019 – March 31, 2019     | March 1, 2020 – March 31, 2020     | Breast*          | Proprietary provider clearinghouse registry                                 | 9.5 |
|      | USA    | March 1, 2019 – March 31, 2019     | March 1, 2020 – March 31, 2020     | Colorectal*      | Proprietary provider clearinghouse registry                                 | 9.5 |
|      | USA    | March 1, 2019 – March 31, 2019     | March 1, 2020 – March 31, 2020     | Prostate*        | Proprietary provider clearinghouse registry                                 | 9.5 |
|      | USA    | July 1, 2019 – July 31, 2019       | July 1, 2020 – July 31, 2020       | Miscellaneous*   | Proprietary provider clearinghouse registry                                 | 9.5 |
|      | USA    | July 1, 2019 – July 31, 2019       | July 1, 2020 – July 31, 2020       | Breast*          | Proprietary provider clearinghouse registry                                 | 9.5 |
|      | USA    | July 1, 2019 – July 31, 2019       | July 1, 2020 – July 31, 2020       | Colorectal*      | Proprietary provider clearinghouse registry                                 | 9.5 |
|      | USA    | July 1, 2019 – July 31, 2019       | July 1, 2020 – July 31, 2020       | Prostate*        | Proprietary provider clearinghouse registry                                 | 9.5 |
|      | USA    | April 1, 2019 – April 30, 2019     | April 1, 2020 – April 30, 2020     | Miscellaneous*   | Proprietary provider clearinghouse registry                                 | 9.5 |

|      |         |                                     |                                      |                |                                                                                                                                                                                              |     |
|------|---------|-------------------------------------|--------------------------------------|----------------|----------------------------------------------------------------------------------------------------------------------------------------------------------------------------------------------|-----|
|      | USA     | April 1, 2019 – April 30, 2019      | April 1, 2020 – April 30, 2020       | Breast*        | Proprietary provider clearinghouse registry                                                                                                                                                  | 9.5 |
|      | USA     | April 1, 2019 – April 30, 2019      | April 1, 2020 – April 30, 2020       | Colorectal*    | Proprietary provider clearinghouse registry                                                                                                                                                  | 9.5 |
|      | USA     | April 1, 2019 – April 30, 2019      | April 1, 2020 – April 30, 2020       | Prostate*      | Proprietary provider clearinghouse registry                                                                                                                                                  | 9.5 |
|      | USA     | May 1, 2019 – May 31, 2019          | May 1, 2020 – May 31, 2020           | Miscellaneous* | Proprietary provider clearinghouse registry                                                                                                                                                  | 9.5 |
|      | USA     | May 1, 2019 – May 31, 2019          | May 1, 2020 – May 31, 2020           | Breast*        | Proprietary provider clearinghouse registry                                                                                                                                                  | 9.5 |
|      | USA     | May 1, 2019 – May 31, 2019          | May 1, 2020 – May 31, 2020           | Colorectal*    | Proprietary provider clearinghouse registry                                                                                                                                                  | 9.5 |
|      | USA     | May 1, 2019 – May 31, 2019          | May 1, 2020 – May 31, 2020           | Prostate*      | Proprietary provider clearinghouse registry                                                                                                                                                  | 9.5 |
|      | USA     | June 1, 2019 – June 30, 2019        | June 1, 2020 – June 30, 2020         | Miscellaneous* | Proprietary provider clearinghouse registry                                                                                                                                                  | 9.5 |
|      | USA     | June 1, 2019 – June 30, 2019        | June 1, 2020 – June 30, 2020         | Breast*        | Proprietary provider clearinghouse registry                                                                                                                                                  | 9.5 |
|      | USA     | June 1, 2019 – June 30, 2019        | June 1, 2020 – June 30, 2020         | Colorectal*    | Proprietary provider clearinghouse registry                                                                                                                                                  | 9.5 |
|      | USA     | June 1, 2019 – June 30, 2019        | June 1, 2020 – June 30, 2020         | Prostate*      | Proprietary provider clearinghouse registry                                                                                                                                                  | 9.5 |
| (12) | Brazil  | March 1, 2019 – June 30, 2019       | March 1, 2020 – June 30, 2020        | Head and neck  | Public archives of the Hospital Information System of the Brazil's Unified Health System (SIH/SUS) and Outpatient Information System (SUS-SAI/SUS) from Department of Informatics of the SUS | 7.5 |
|      | Brazil  | March 1, 2019 – June 30, 2019       | March 1, 2020 – June 30, 2020        | Head and neck  | Public archives of the Hospital Information System of the Brazil's Unified Health System (SIH/SUS) and Outpatient Information System (SUS-SAI/SUS) from Department of Informatics of the SUS | 7.5 |
| (13) | Uruguay | March 1, 2019 – June 30, 2019       | March 1, 2020 – June 30, 2020        | Breast         | Mastology Unit of the School of Medicine, Unidad Docente Asistencial de Mastologia (UDAM)                                                                                                    | 7.5 |
| (14) | Italy   | March 9, 2019 – August 31, 2019     | March 9, 2020 – August 31, 2020      | Thyroid        | Aggregated data from 28 Italian surgical units                                                                                                                                               | 7.5 |
| (15) | UK      | January 1, 2019 – December 31, 2019 | January 1, 2020 – January 31, 2020   | Colorectal     | National Health Service (NHS) population-based datasets                                                                                                                                      | 7   |
|      | UK      | January 1, 2019 – December 31, 2019 | February 1, 2020 – February 29, 2020 | Colorectal     | National Health Service (NHS) population-based datasets                                                                                                                                      | 7   |
|      | UK      | January 1, 2019 – December 31, 2019 | March 1, 2020 – March 31, 2020       | Colorectal     | National Health Service (NHS) population-based datasets                                                                                                                                      | 7   |

|      |       |                                     |                                        |             |                                                                       |     |
|------|-------|-------------------------------------|----------------------------------------|-------------|-----------------------------------------------------------------------|-----|
|      | UK    | January 1, 2019 – December 31, 2019 | April 1, 2020 – April 30, 2020         | Colorectal  | National Health Service (NHS) population-based datasets               | 7   |
|      | UK    | January 1, 2019 – December 31, 2019 | May 1, 2020 – May 31, 2020             | Colorectal  | National Health Service (NHS) population-based datasets               | 7   |
|      | UK    | January 1, 2019 – December 31, 2019 | June 1, 2020 – June 30, 2020           | Colorectal  | National Health Service (NHS) population-based datasets               | 7   |
|      | UK    | January 1, 2019 – December 31, 2019 | July 1, 2020 – July 31, 2020           | Colorectal  | National Health Service (NHS) population-based datasets               | 7   |
|      | UK    | January 1, 2019 – December 31, 2019 | August 1, 2020 – August 31, 2020       | Colorectal  | National Health Service (NHS) population-based datasets               | 7   |
|      | UK    | January 1, 2019 – December 31, 2019 | September 1, 2020 – September 30, 2020 | Colorectal  | National Health Service (NHS) population-based datasets               | 7   |
|      | UK    | January 1, 2019 – December 31, 2019 | October 1, 2020 – October 31, 2020     | Colorectal  | National Health Service (NHS) population-based datasets               | 7   |
|      | UK    | January 1, 2019 – December 31, 2019 | January 1, 2020 – January 31, 2020     | Colorectal  | National Health Service (NHS) population-based datasets               | 7   |
|      | UK    | January 1, 2019 – December 31, 2019 | February 1, 2020 – February 29, 2020   | Colorectal  | National Health Service (NHS) population-based datasets               | 7   |
|      | UK    | January 1, 2019 – December 31, 2019 | March 1, 2020 – March 31, 2020         | Colorectal  | National Health Service (NHS) population-based datasets               | 7   |
|      | UK    | January 1, 2019 – December 31, 2019 | April 1, 2020 – April 30, 2020         | Colorectal  | National Health Service (NHS) population-based datasets               | 7   |
|      | UK    | January 1, 2019 – December 31, 2019 | May 1, 2020 – May 31, 2020             | Colorectal  | National Health Service (NHS) population-based datasets               | 7   |
|      | UK    | January 1, 2019 – December 31, 2019 | June 1, 2020 – June 30, 2020           | Colorectal  | National Health Service (NHS) population-based datasets               | 7   |
|      | UK    | January 1, 2019 – December 31, 2019 | July 1, 2020 – July 31, 2020           | Colorectal  | National Health Service (NHS) population-based datasets               | 7   |
|      | UK    | January 1, 2019 – December 31, 2019 | August 1, 2020 – August 31, 2020       | Colorectal  | National Health Service (NHS) population-based datasets               | 7   |
|      | UK    | January 1, 2019 – December 31, 2019 | September 1, 2020 – September 30, 2020 | Colorectal  | National Health Service (NHS) population-based datasets               | 7   |
|      | UK    | January 1, 2019 – December 31, 2019 | October 1, 2020 – October 31, 2020     | Colorectal  | National Health Service (NHS) population-based datasets               | 7   |
| (16) | Italy | March 11, 2019 – May 05, 2019       | March 09, 2020 – May 04, 2020          | Colorectal* | Eight tertiary centres, representative of Northern and Southern Italy | 9.5 |

|      |         |                                   |                                   |                    |                                                                                                                                                                          |     |
|------|---------|-----------------------------------|-----------------------------------|--------------------|--------------------------------------------------------------------------------------------------------------------------------------------------------------------------|-----|
| (17) | Germany | April 01, 2019 – June 30, 2019    | April 01, 2020 – June 30, 2020    | Lung*              | BARMER Ersatzkasse (one of Germany's leading providers of statutory health insurance)                                                                                    | 8   |
|      | Germany | April 01, 2019 – June 30, 2019    | April 01, 2020 – June 30, 2020    | Breast*            | BARMER Ersatzkasse (one of Germany's leading providers of statutory health insurance)                                                                                    | 8   |
|      | Germany | April 01, 2019 – June 30, 2019    | April 01, 2020 – June 30, 2020    | Esophageal*        | BARMER Ersatzkasse (one of Germany's leading providers of statutory health insurance)                                                                                    | 8   |
|      | Germany | April 01, 2019 – June 30, 2019    | April 01, 2020 – June 30, 2020    | Stomach*           | BARMER Ersatzkasse (one of Germany's leading providers of statutory health insurance)                                                                                    | 8   |
|      | Germany | April 01, 2019 – June 30, 2019    | April 01, 2020 – June 30, 2020    | Pancreas*          | BARMER Ersatzkasse (one of Germany's leading providers of statutory health insurance)                                                                                    | 8   |
|      | Germany | April 01, 2019 – June 30, 2019    | April 01, 2020 – June 30, 2020    | Colon only*        | BARMER Ersatzkasse (one of Germany's leading providers of statutory health insurance)                                                                                    | 8   |
|      | Germany | April 01, 2019 – June 30, 2019    | April 01, 2020 – June 30, 2020    | Rectum only*       | BARMER Ersatzkasse (one of Germany's leading providers of statutory health insurance)                                                                                    | 8   |
|      | Germany | April 01, 2019 – June 30, 2019    | April 01, 2020 – June 30, 2020    | Kidney*            | BARMER Ersatzkasse (one of Germany's leading providers of statutory health insurance)                                                                                    | 8   |
|      | Germany | April 01, 2019 – June 30, 2019    | April 01, 2020 – June 30, 2020    | Prostate*          | BARMER Ersatzkasse (one of Germany's leading providers of statutory health insurance)                                                                                    | 8   |
| (18) | Spain   | February 25, 2019 – June 15, 2019 | February 25, 2020 – June 15, 2020 | Hematologic cancer | La Paz University Hospital (Hematology Unit)                                                                                                                             | 7.5 |
| (19) | Israel  | March 14, 2019 – April 30, 2019   | March 14, 2020 – April 30, 2020   | Melanoma           | Rambam Health Care Campus (RHCC)                                                                                                                                         | 8.5 |
| (20) | Brazil  | March 09, 2019 – May 30, 2019     | March 09, 2020 – May 30, 2020     | Breast*            | AC Camargo Cancer Center (Breast Surgery Department)                                                                                                                     | 7.5 |
| (21) | Italy   | March 09, 2019 – May 08, 2019     | March 09, 2020 – May 08, 2020     | Miscellaneous      | Pathological reporting software (Winsap, Engineering, Rome, Italy) of the Pathology Units of "Città della Salute e della Scienza di Torino" University Hospital of Turin | 9   |
|      | Italy   | March 09, 2019 – May 08, 2019     | March 09, 2020 – May 08, 2020     | Lung               | Pathological reporting software (Winsap, Engineering, Rome, Italy) of the Pathology Units of "Città della Salute e della Scienza di Torino" University Hospital of Turin | 9   |
|      | Italy   | March 09, 2019 – May 08, 2019     | March 09, 2020 – May 08, 2020     | Prostate           | Pathological reporting software (Winsap, Engineering, Rome, Italy) of the Pathology Units of "Città della Salute e della Scienza di Torino" University Hospital of Turin | 9   |
|      | Italy   | March 09, 2019 – May 08, 2019     | March 09, 2020 – May 08, 2020     | Colorectal         | Pathological reporting software (Winsap, Engineering, Rome, Italy) of the Pathology Units of "Città della Salute e della Scienza di Torino" University Hospital of Turin | 9   |
|      | Italy   | March 09, 2019 – May 08, 2019     | March 09, 2020 – May 08, 2020     | Breast             | Pathological reporting software (Winsap, Engineering, Rome, Italy) of the Pathology Units of "Città della Salute e della Scienza di Torino" University Hospital of Turin | 9   |
| (22) | Chile   | March 16, 2019 – June 07, 2019    | March 16, 2020 – June 07, 2020    | Genito-Urinary     | Database of urological oncological surgery                                                                                                                               | 7.5 |
| (23) | UK      | March 23, 2019 – June 07, 2019    | March 23, 2020 – June 07, 2020    | Colorectal         | Private Trust                                                                                                                                                            | 8.5 |

|      |        |                                      |                                    |               |                                                                                                                 |     |
|------|--------|--------------------------------------|------------------------------------|---------------|-----------------------------------------------------------------------------------------------------------------|-----|
| (24) | Italy  | February 24, 2019 – May 08, 2019     | February 24, 2020 – May 08, 2020   | Miscellaneous | Tertiary care center in Northern Italy                                                                          | 7.5 |
|      | Italy  | February 24, 2019 – May 08, 2019     | February 24, 2020 – May 08, 2020   | Colorectal    | Tertiary care center in Northern Italy                                                                          | 7.5 |
| (25) | France | January 20, 2020 – March 15, 2020    | March 16, 2020 – May 10, 2020      | Miscellaneous | The Oscar Lambret Cancer center (Comprehensive Cancer Center of Northern France)                                | 9   |
|      | France | January 20, 2020 – March 15, 2020    | May 11, 2020 – July 06, 2020       | Miscellaneous | The Oscar Lambret Cancer center (Comprehensive Cancer Center of Northern France)                                | 9   |
|      | France | January 20, 2020 – March 15, 2020    | March 16, 2020 – May 10, 2020      | Miscellaneous | The Oscar Lambret Cancer center (Comprehensive Cancer Center of Northern France)                                | 9   |
|      | France | January 20, 2020 – March 15, 2020    | May 11, 2020 – July 06, 2020       | Miscellaneous | The Oscar Lambret Cancer center (Comprehensive Cancer Center of Northern France)                                | 9   |
|      | France | January 20, 2020 – March 15, 2020    | March 16, 2020 – May 10, 2020      | Miscellaneous | The Oscar Lambret Cancer center (Comprehensive Cancer Center of Northern France)                                | 9   |
|      | France | January 20, 2020 – March 15, 2020    | May 11, 2020 – July 06, 2020       | Miscellaneous | The Oscar Lambret Cancer center (Comprehensive Cancer Center of Northern France)                                | 9   |
| (26) | India  | October 01, 2019 – February 29, 2020 | March 01, 2020 – July 31, 2020     | Miscellaneous | Royapettah cancer hospital                                                                                      | 7.5 |
|      | India  | October 01, 2019 – February 29, 2020 | March 01, 2020 – July 31, 2020     | Miscellaneous | Royapettah cancer hospital                                                                                      | 7.5 |
| (27) | Italy  | February 01, 2019 – April 30, 2019   | February 01, 2020 – April 30, 2020 | Breast        | Fondazione Policlinico Agostino Gemelli-IRCCS, Rome                                                             | 7   |
| (28) | Italy  | February 01, 2019 – April 30, 2019   | February 01, 2020 – April 30, 2020 | Gynecologic   | Fondazione Policlinico Agostino Gemelli-IRCCS, Rome                                                             | 9.5 |
| (29) | Italy  | June 01, 2019 – September 30, 2019   | June 01, 2020 – September 30, 2020 | Lung          | IEO, European Institute of Oncology IRCCS                                                                       | 10  |
| (30) | USA    | January 01, 2020 – February 29, 2020 | March 01, 2020 – April 30, 2020    | Skin cancer   | Plastic Surgical Treatment Centre (PSTC)                                                                        | 8   |
| (31) | Sweden | March 18, 2019 – June 02, 2019       | March 18, 2020 – June 02, 2020     | Prostate      | Swedish Cancer Registry                                                                                         | 9.5 |
|      | Sweden | March 18, 2019 – June 02, 2019       | March 18, 2020 – June 02, 2020     | Prostate      | Swedish Cancer Registry                                                                                         | 9.5 |
| (32) | Italy  | February 01, 2019 – March 31, 2019   | February 01, 2020 – March 31, 2020 | Miscellaneous | Radiation Oncology Unit, Radiotherapy Department, Santa Maria della Misericordia Hospital, ULSS5, Rovigo, Italy | 9   |
| (33) | Italy  | March 09, 2019 – May 31, 2019        | March 09, 2020 – May 31, 2020      | Miscellaneous | Operative Unit of Radiotherapy (OUR) of the University Hospital of Pisa                                         | 9.5 |
|      | Italy  | March 09, 2019 – May 31, 2019        | March 09, 2020 – May 31, 2020      | Miscellaneous | Operative Unit of Radiotherapy (OUR) of the University Hospital of Pisa                                         | 9.5 |
|      | Italy  | March 09, 2019 – May 31, 2019        | March 09, 2020 – May 31, 2020      | Melanoma      | Operative Unit of Radiotherapy (OUR) of the University Hospital of Pisa                                         | 9.5 |
|      | Italy  | March 09, 2019 – May 31, 2019        | March 09, 2020 – May 31, 2020      | Breast        | Operative Unit of Radiotherapy (OUR) of the University Hospital of Pisa                                         | 9.5 |
|      | Italy  | March 09, 2019 – May 31, 2019        | March 09, 2020 – May 31, 2020      | CNS           | Operative Unit of Radiotherapy (OUR) of the University Hospital of Pisa                                         | 9.5 |
| (34) | Italy  | March 09, 2019 – December 23, 2019   | March 09, 2020 – December 23, 2020 | Endocrine     | Padua Endocrine Surgery Unit                                                                                    | 8.5 |
|      | Italy  | March 09, 2019 – December 23, 2019   | March 09, 2020 –                   | Thyroid       | Padua Endocrine Surgery Unit                                                                                    | 8.5 |



|      |           |                                        |                                       |               |                                                               |     |
|------|-----------|----------------------------------------|---------------------------------------|---------------|---------------------------------------------------------------|-----|
|      |           |                                        | December 23, 2020                     |               |                                                               |     |
| (35) | Australia | April 01, 2019 – June 30, 2019         | January 01, 2020 – March 31, 2020     | Skin cancer*  | MedicineInsight and national Medicare Benefits Schedule (MBS) | 7.5 |
| (36) | England   | January 01, 2019 – June 30, 2019       | January 01, 2020 – June 30, 2020      | Breast        | National Health Service (NHS) cancer service activity         | 8.5 |
|      | England   | January 01, 2019 – January 31, 2019    | January 01, 2020 – January 31, 2020   | Breast        | National Health Service (NHS) cancer service activity         | 8.5 |
|      | England   | February 01, 2019 – February 28, 2019  | February 01, 2020 – February 29, 2020 | Breast        | National Health Service (NHS) cancer service activity         | 8.5 |
|      | England   | March 01, 2019 – March 31, 2019        | March 01, 2020 – March 31, 2020       | Breast        | National Health Service (NHS) cancer service activity         | 8.5 |
|      | England   | April 01, 2019 – April 30, 2019        | April 01, 2020 – April 30, 2020       | Breast        | National Health Service (NHS) cancer service activity         | 8.5 |
|      | England   | May 01, 2019 – May 31, 2019            | May 01, 2020 – May 31, 2020           | Breast        | National Health Service (NHS) cancer service activity         | 8.5 |
|      | England   | June 01, 2019 – June 30, 2019          | June 01, 2020 – June 30, 2020         | Breast        | National Health Service (NHS) cancer service activity         | 8.5 |
| (37) | England   | September 01, 2019 – February 29, 2020 | April 01, 2020 – April 30, 2020       | Miscellaneous | Central National Health Service England web database          | 9.5 |
|      | England   | September 01, 2019 – February 29, 2020 | May 01, 2020 – May 31, 2020           | Miscellaneous | Central National Health Service England web database          | 9.5 |
|      | England   | September 01, 2019 – February 29, 2020 | June 01, 2020 – June 30, 2020         | Miscellaneous | Central National Health Service England web database          | 9.5 |
|      | England   | September 01, 2019 – February 29, 2020 | April 01, 2020 – April 30, 2020       | Miscellaneous | Central National Health Service England web database          | 9.5 |
|      | England   | September 01, 2019 – February 29, 2020 | May 01, 2020 – May 31, 2020           | Miscellaneous | Central National Health Service England web database          | 9.5 |
|      | England   | September 01, 2019 – February 29, 2020 | June 01, 2020 – June 30, 2020         | Miscellaneous | Central National Health Service England web database          | 9.5 |
|      | England   | September 01, 2019 – February 29, 2020 | April 01, 2020 – April 30, 2020       | Miscellaneous | Central National Health Service England web database          | 9.5 |
|      | England   | September 01, 2019 – February 29, 2020 | May 01, 2020 – May 31, 2020           | Miscellaneous | Central National Health Service England web database          | 9.5 |
|      | England   | September 01, 2019 – February 29, 2020 | June 01, 2020 – June 30, 2020         | Miscellaneous | Central National Health Service England web database          | 9.5 |
|      | England   | September 01, 2019 – February 29, 2020 | April 01, 2020 – April 30, 2020       | Miscellaneous | Central National Health Service England web database          | 9.5 |
|      | England   | September 01, 2019 – February 29, 2020 | May 01, 2020 – May 31, 2020           | Miscellaneous | Central National Health Service England web database          | 9.5 |
|      | England   | September 01, 2019 – February 29, 2020 | June 01, 2020 – June 30, 2020         | Miscellaneous | Central National Health Service England web database          | 9.5 |
|      | England   | September 01, 2019 – February 29, 2020 | April 01, 2020 – April 30, 2020       | Breast        | Central National Health Service England web database          | 9.5 |
|      | England   | September 01, 2019 – February 29, 2020 | April 01, 2020 – April 30, 2020       | Prostate      | Central National Health Service England web database          | 9.5 |
|      | England   | September 01, 2019 – February 29, 2020 | April 01, 2020 – April 30, 2020       | Lung          | Central National Health Service England web database          | 9.5 |



|      |         |                                        |                                 |                |                                                      |     |
|------|---------|----------------------------------------|---------------------------------|----------------|------------------------------------------------------|-----|
|      | England | September 01, 2019 – February 29, 2020 | April 01, 2020 – April 30, 2020 | Skin cancer    | Central National Health Service England web database | 9.5 |
|      | England | September 01, 2019 – February 29, 2020 | June 01, 2020 – June 30, 2020   | Prostate       | Central National Health Service England web database | 9.5 |
|      | England | September 01, 2019 – February 29, 2020 | June 01, 2020 – June 30, 2020   | Lung           | Central National Health Service England web database | 9.5 |
| (38) | UK      | April 01, 2019 – April 30, 2019        | April 01, 2020 – April 30, 2020 | Miscellaneous* | National Radiotherapy Dataset                        | 9   |
|      | UK      | May 01, 2019 – May 31, 2019            | May 01, 2020 – May 31, 2020     | Miscellaneous* | National Radiotherapy Dataset                        | 9   |
|      | UK      | June 01, 2019 – June 30, 2019          | June 01, 2020 – June 30, 2020   | Miscellaneous* | National Radiotherapy Dataset                        | 9   |
|      | UK      | April 01, 2019 – April 30, 2019        | April 01, 2020 – April 30, 2020 | Anal*          | National Radiotherapy Dataset                        | 9   |
|      | UK      | May 01, 2019 – May 31, 2019            | May 01, 2020 – May 31, 2020     | Anal*          | National Radiotherapy Dataset                        | 9   |
|      | UK      | June 01, 2019 – June 30, 2019          | June 01, 2020 – June 30, 2020   | Anal*          | National Radiotherapy Dataset                        | 9   |
|      | UK      | April 01, 2019 – April 30, 2019        | April 01, 2020 – April 30, 2020 | Bladder*       | National Radiotherapy Dataset                        | 9   |
|      | UK      | May 01, 2019 – May 31, 2019            | May 01, 2020 – May 31, 2020     | Bladder*       | National Radiotherapy Dataset                        | 9   |
|      | UK      | June 01, 2019 – June 30, 2019          | June 01, 2020 – June 30, 2020   | Bladder*       | National Radiotherapy Dataset                        | 9   |
|      | UK      | April 01, 2019 – April 30, 2019        | April 01, 2020 – April 30, 2020 | CNS*           | National Radiotherapy Dataset                        | 9   |
|      | UK      | May 01, 2019 – May 31, 2019            | May 01, 2020 – May 31, 2020     | CNS*           | National Radiotherapy Dataset                        | 9   |
|      | UK      | June 01, 2019 – June 30, 2019          | June 01, 2020 – June 30, 2020   | CNS*           | National Radiotherapy Dataset                        | 9   |
|      | UK      | April 01, 2019 – April 30, 2019        | April 01, 2020 – April 30, 2020 | Cervix*        | National Radiotherapy Dataset                        | 9   |
|      | UK      | May 01, 2019 – May 31, 2019            | May 01, 2020 – May 31, 2020     | Cervix*        | National Radiotherapy Dataset                        | 9   |
|      | UK      | June 01, 2019 – June 30, 2019          | June 01, 2020 – June 30, 2020   | Cervix*        | National Radiotherapy Dataset                        | 9   |
|      | UK      | April 01, 2019 – April 30, 2019        | April 01, 2020 – April 30, 2020 | Head and Neck* | National Radiotherapy Dataset                        | 9   |
|      | UK      | May 01, 2019 – May 31, 2019            | May 01, 2020 – May 31, 2020     | Head and Neck* | National Radiotherapy Dataset                        | 9   |
|      | UK      | June 01, 2019 – June 30, 2019          | June 01, 2020 – June 30, 2020   | Head and Neck* | National Radiotherapy Dataset                        | 9   |
|      | UK      | April 01, 2019 – April 30, 2019        | April 01, 2020 – April 30, 2020 | Lung*          | National Radiotherapy Dataset                        | 9   |
|      | UK      | May 01, 2019 – May 31, 2019            | May 01, 2020 – May 31, 2020     | Lung*          | National Radiotherapy Dataset                        | 9   |
|      | UK      | June 01, 2019 – June 30, 2019          | June 01, 2020 – June 30, 2020   | Lung*          | National Radiotherapy Dataset                        | 9   |
|      | UK      | April 01, 2019 – April 30, 2019        | April 01, 2020 – April 30, 2020 | Breast*        | National Radiotherapy Dataset                        | 9   |

|      |         |                                 |                                 |              |                                                                                    |     |
|------|---------|---------------------------------|---------------------------------|--------------|------------------------------------------------------------------------------------|-----|
|      | UK      | May 01, 2019 – May 31, 2019     | May 01, 2020 – May 31, 2020     | Breast*      | National Radiotherapy Dataset                                                      | 9   |
|      | UK      | June 01, 2019 – June 30, 2019   | June 01, 2020 – June 30, 2020   | Breast*      | National Radiotherapy Dataset                                                      | 9   |
|      | UK      | April 01, 2019 – April 30, 2019 | April 01, 2020 – April 30, 2020 | Esophageal*  | National Radiotherapy Dataset                                                      | 9   |
|      | UK      | May 01, 2019 – May 31, 2019     | May 01, 2020 – May 31, 2020     | Esophageal*  | National Radiotherapy Dataset                                                      | 9   |
|      | UK      | June 01, 2019 – June 30, 2019   | June 01, 2020 – June 30, 2020   | Esophageal*  | National Radiotherapy Dataset                                                      | 9   |
|      | UK      | April 01, 2019 – April 30, 2019 | April 01, 2020 – April 30, 2020 | Prostate*    | National Radiotherapy Dataset                                                      | 9   |
|      | UK      | May 01, 2019 – May 31, 2019     | May 01, 2020 – May 31, 2020     | Prostate*    | National Radiotherapy Dataset                                                      | 9   |
|      | UK      | June 01, 2019 – June 30, 2019   | June 01, 2020 – June 30, 2020   | Prostate*    | National Radiotherapy Dataset                                                      | 9   |
|      | UK      | April 01, 2019 – April 30, 2019 | April 01, 2020 – April 30, 2020 | Colorectal*  | National Radiotherapy Dataset                                                      | 9   |
|      | UK      | May 01, 2019 – May 31, 2019     | May 01, 2020 – May 31, 2020     | Colorectal*  | National Radiotherapy Dataset                                                      | 9   |
|      | UK      | June 01, 2019 – June 30, 2019   | June 01, 2020 – June 30, 2020   | Colorectal*  | National Radiotherapy Dataset                                                      | 9   |
|      | UK      | April 01, 2019 – April 30, 2019 | April 01, 2020 – April 30, 2020 | Skin cancer* | National Radiotherapy Dataset                                                      | 9   |
|      | UK      | May 01, 2019 – May 31, 2019     | May 01, 2020 – May 31, 2020     | Skin cancer* | National Radiotherapy Dataset                                                      | 9   |
|      | UK      | June 01, 2019 – June 30, 2019   | June 01, 2020 – June 30, 2020   | Skin cancer* | National Radiotherapy Dataset                                                      | 9   |
| (39) | Croatia | March 01, 2019 – May 31, 2019   | March 01, 2020 – May 31, 2020   | Skin cancer  | Maxillofacial and Oral Surgery Department (Department), Osijek University Hospital | 9.5 |
| (40) | Italy   | March 09, 2019 – May 05, 2019   | March 09, 2020 – May 05, 2020   | Cervix       | University Hospital of Bologna, Italy (Gynaecologic Oncology Unit)                 | 9.5 |
|      | Italy   | March 09, 2019 – May 05, 2019   | March 09, 2020 – May 05, 2020   | Gynecologic  | University Hospital of Bologna, Italy (Gynaecologic Oncology Unit)                 | 9.5 |
|      | Italy   | March 09, 2019 – May 05, 2019   | March 09, 2020 – May 05, 2020   | Gynecologic  | University Hospital of Bologna, Italy (Gynaecologic Oncology Unit)                 | 9.5 |
|      | Italy   | March 09, 2019 – May 05, 2019   | March 09, 2020 – May 05, 2020   | Gynecologic  | University Hospital of Bologna, Italy (Gynaecologic Oncology Unit)                 | 9.5 |
|      | Italy   | March 09, 2019 – May 05, 2019   | March 09, 2020 – May 05, 2020   | Gynecologic  | University Hospital of Bologna, Italy (Gynaecologic Oncology Unit)                 | 9.5 |
| (41) | USA     | April 28, 2019 – July 31, 2019  | April 28, 2020 – July 31, 2020  | Skin cancer  | Department of Dermatology, Beth Israel Deaconess Medical Center, Boston            | 7.5 |
|      | USA     | April 28, 2019 – July 31, 2019  | April 28, 2020 – July 31, 2020  | Melanoma     | Department of Dermatology, Beth Israel Deaconess Medical Center, Boston            | 7.5 |

|      |             |                                   |                                  |                |                                                                         |     |
|------|-------------|-----------------------------------|----------------------------------|----------------|-------------------------------------------------------------------------|-----|
|      | USA         | April 28, 2019 – July 31, 2019    | April 28, 2020 – July 31, 2020   | Scc            | Department of Dermatology, Beth Israel Deaconess Medical Center, Boston | 7.5 |
|      | USA         | April 28, 2019 – July 31, 2019    | April 28, 2020 – July 31, 2020   | Bcc            | Department of Dermatology, Beth Israel Deaconess Medical Center, Boston | 7.5 |
| (42) | South Korea | January 28, 2019 – July 31, 2019  | January 28, 2020 – July 31, 2020 | Breast         | Department of Radiation Oncology, Ajou University School of Medicine    | 9.5 |
| (43) | Italy       | January 01, 2020 – March 08, 2020 | March 09, 2020 – April 30, 2020  | Solid cancer   | Department of Oncology, Mater Salutis Hospital, Legnago (VR)            | 8.5 |
| (44) | Canada      | March 1, 2019 – March 31, 2019    | March 1, 2020 – March 31, 2020   | Cervix*        | CytoBase                                                                | 9.5 |
|      | Canada      | April 1, 2019 – April 30, 2019    | April 1, 2020 – April 30, 2020   | Cervix*        | CytoBase                                                                | 9.5 |
|      | Canada      | May 1, 2019 – May 31, 2019        | May 1, 2020 – May 31, 2020       | Cervix*        | CytoBase                                                                | 9.5 |
|      | Canada      | June 1, 2019 – June 30, 2019      | June 1, 2020 – June 30, 2020     | Cervix*        | CytoBase                                                                | 9.5 |
|      | Canada      | July 1, 2019 – July 31, 2019      | July 1, 2020 – July 31, 2020     | Cervix*        | CytoBase                                                                | 9.5 |
|      | Canada      | August 1, 2019 – August 31, 2019  | August 1, 2020 – August 31, 2020 | Cervix*        | CytoBase                                                                | 9.5 |
| (45) | Uruguay     | March 16, 2019 – April 30, 2019   | March 16, 2020 – April 30, 2020  | Miscellaneous* | Public Provider                                                         | 9.5 |
|      | Uruguay     | May 01, 2019 – May 31, 2019       | May 01, 2020 – May 31, 2020      | Miscellaneous* | Public Provider                                                         | 9.5 |
|      | Uruguay     | June 01, 2019 – June 30, 2019     | June 01, 2020 – June 30, 2020    | Miscellaneous* | Public Provider                                                         | 9.5 |
|      | Uruguay     | March 16, 2019 – June 30, 2019    | March 16, 2020 – June 30, 2020   | Miscellaneous* | National cancer institute                                               | 9.5 |
|      | Chile       | April 01, 2019 – April 30, 2019   | April 01, 2020 – April 30, 2020  | Miscellaneous* | National cancer institute                                               | 9.5 |
|      | Chile       | May 01, 2019 – May 31, 2019       | May 01, 2020 – May 31, 2020      | Miscellaneous* | National cancer institute                                               | 9.5 |
|      | Chile       | June 01, 2019 – June 30, 2019     | June 01, 2020 – June 30, 2020    | Miscellaneous* | National cancer institute                                               | 9.5 |
|      | Chile       | April 01, 2019 – April 30, 2019   | April 01, 2020 – April 30, 2020  | Miscellaneous* | National cancer institute                                               | 9.5 |
|      | Chile       | May 01, 2019 – May 31, 2019       | May 01, 2020 – May 31, 2020      | Miscellaneous* | National cancer institute                                               | 9.5 |
|      | Chile       | June 01, 2019 – June 30, 2019     | June 01, 2020 – June 30, 2020    | Miscellaneous* | National cancer institute                                               | 9.5 |
|      | Chile       | March 16, 2019 – April 30, 2019   | March 16, 2020 – April 30, 2020  | Miscellaneous* | National cancer institute                                               | 9.5 |

|          |                                 |                                 |                |                                                |     |
|----------|---------------------------------|---------------------------------|----------------|------------------------------------------------|-----|
| Chile    | May 1, 2019 – May 31, 2019      | May 1, 2020 – May 31, 2020      | Miscellaneous* | National cancer institute                      | 9.5 |
| Chile    | June 01, 2019 – June 30, 2019   | June 01, 2020 – June 30, 2020   | Miscellaneous* | National cancer institute                      | 9.5 |
| Mexico   | April 01, 2019 – April 30, 2019 | April 01, 2020 – April 30, 2020 | Miscellaneous* | General Hospital and National Cancer institute | 9.5 |
| Mexico   | May 01, 2019 – May 31, 2019     | May 01, 2020 – May 31, 2020     | Miscellaneous* | General Hospital and National Cancer institute | 9.5 |
| Mexico   | June 01, 2019 – June 30, 2019   | June 01, 2020 – June 30, 2020   | Miscellaneous* | General Hospital and National Cancer institute | 9.5 |
| Mexico   | April 01, 2019 – April 30, 2019 | April 01, 2020 – April 30, 2020 | Miscellaneous* | General Hospital and National Cancer institute | 9.5 |
| Mexico   | May 01, 2019 – May 31, 2019     | May 01, 2020 – May 31, 2020     | Miscellaneous* | General Hospital and National Cancer institute | 9.5 |
| Mexico   | June 01, 2019 – June 30, 2019   | June 01, 2020 – June 30, 2020   | Miscellaneous* | General Hospital and National Cancer institute | 9.5 |
| Mexico   | March 16, 2019 – June 30, 2019  | March 16, 2020 – June 30, 2020  | Miscellaneous* | General Hospital                               | 9.5 |
| Mexico   | April 01, 2019 – April 30, 2019 | April 01, 2020 – April 30, 2020 | Miscellaneous* | General Hospital and National Cancer institute | 9.5 |
| Mexico   | May 01, 2019 – May 31, 2019     | May 01, 2020 – May 31, 2020     | Miscellaneous* | General Hospital and National Cancer institute | 9.5 |
| Mexico   | June 01, 2019 – June 30, 2019   | June 01, 2020 – June 30, 2020   | Miscellaneous* | General Hospital and National Cancer institute | 9.5 |
| Mexico   | April 01, 2019 – April 30, 2019 | April 01, 2020 – April 30, 2020 | Miscellaneous* | General Hospital and National Cancer institute | 9.5 |
| Mexico   | May 01, 2019 – May 31, 2019     | May 01, 2020 – May 31, 2020     | Miscellaneous* | General Hospital and National Cancer institute | 9.5 |
| Mexico   | June 01, 2019 – June 30, 2019   | June 01, 2020 – June 30, 2020   | Miscellaneous* | General Hospital and National Cancer institute | 9.5 |
| Colombia | March 16, 2019 – April 30, 2019 | March 16, 2020 – April 30, 2020 | Miscellaneous* | Private Provider                               | 9.5 |
| Colombia | May 01, 2019 – May 31, 2019     | May 01, 2020 – May 31, 2020     | Miscellaneous* | Private Provider                               | 9.5 |
| Colombia | June 01, 2019 – June 30, 2019   | June 01, 2020 – June 30, 2020   | Miscellaneous* | Private Provider                               | 9.5 |
| Colombia | March 16, 2019 – April 30, 2019 | March 16, 2020 – April 30, 2020 | Miscellaneous* | Private Provider                               | 9.5 |

|      |          |                                 |                                 |                |                                                                                                                      |     |
|------|----------|---------------------------------|---------------------------------|----------------|----------------------------------------------------------------------------------------------------------------------|-----|
|      | Colombia | May 01, 2019 – May 31, 2019     | May 01, 2020 – May 31, 2020     | Miscellaneous* | Private Provider                                                                                                     | 9.5 |
|      | Colombia | May 01, 2019 – May 31, 2019     | June 01, 20120 – June 30, 2020  | Miscellaneous* | Private Provider                                                                                                     | 9.5 |
|      | Perù     | March 16, 2019 – April 30, 2019 | March 16, 2020 – April 30, 2020 | Miscellaneous* | Private Provider                                                                                                     | 9.5 |
|      | Perù     | March 16, 2019 – April 30, 2019 | March 16, 2020 – April 30, 2020 | Miscellaneous* | Private Provider                                                                                                     | 9.5 |
|      | Perù     | March 16, 2019 – June 30, 2019  | March 16, 2020 – June 30, 2020  | Miscellaneous* | Private Provider                                                                                                     | 9.5 |
|      | Perù     | March 16, 2019 – June 30, 2019  | March 16, 2020 – June 30, 2020  | Miscellaneous* | Private Provider                                                                                                     | 9.5 |
|      | Brazil   | March 16, 2019 – April 30, 2019 | March 16, 2020 – April 30, 2020 | Miscellaneous* | Public Provider                                                                                                      | 9.5 |
|      | Brazil   | May 01, 2019 – May 31, 2019     | May 01, 2020 – May 31, 2020     | Miscellaneous* | Public Provider                                                                                                      | 9.5 |
|      | Brazil   | June 01, 2019 – June 30, 2019   | June 01, 20120 – June 30, 2020  | Miscellaneous* | Public Provider                                                                                                      | 9.5 |
|      | Brazil   | March 16, 2019 – April 30, 2019 | March 16, 2020 – April 30, 2020 | Miscellaneous* | Public Provider                                                                                                      | 9.5 |
|      | Brazil   | May 01, 2019 – May 31, 2019     | May 01, 2020 – May 31, 2020     | Miscellaneous* | Public Provider                                                                                                      | 9.5 |
|      | Brazil   | June 01, 2019 – June 30, 2019   | June 01, 20120 – June 30, 2020  | Miscellaneous* | Public Provider                                                                                                      | 9.5 |
|      | Brazil   | March 16, 2019 – April 30, 2019 | March 16, 2020 – April 30, 2020 | Miscellaneous* | Public Provider                                                                                                      | 9.5 |
|      | Brazil   | May 01, 2019 – May 31, 2019     | May 01, 2020 – May 31, 2020     | Miscellaneous* | Public Provider                                                                                                      | 9.5 |
|      | Brazil   | June 01, 2019 – June 30, 2019   | June 01, 20120 – June 30, 2020  | Miscellaneous* | Public Provider                                                                                                      | 9.5 |
|      | Brazil   | March 16, 2019 – June 30, 2019  | March 16, 2020 – June 30, 2020  | Miscellaneous* | Public Provider                                                                                                      | 9.5 |
| (46) | Brazil   | March 1, 2019 – May 31, 2019    | March 1, 2020 – May 31, 2020    | Miscellaneous* | Brazil's National Health System                                                                                      | 9   |
|      | Brazil   | March 1, 2019 – May 31, 2019    | March 1, 2020 – May 31, 2020    | Miscellaneous* | Brazil's National Health System                                                                                      | 9   |
| (47) | France   | April 1, 2019 – May 31, 2019    | April 1, 2020 – May 31, 2020    | Miscellaneous* | University Hospital and Godinot Cancer Institute in Reims, Cancer Coordination Center (3C), Pasteur Hospital, Colmar | 9.5 |
|      | France   | April 1, 2019 – May 31, 2019    | April 1, 2020 – May 31, 2020    | Miscellaneous* | University Hospital and Godinot Cancer Institute in Reims, Cancer Coordination Center (3C), Pasteur Hospital, Colmar | 9.5 |

|  |        |                              |                              |                |                                                                                                                      |     |
|--|--------|------------------------------|------------------------------|----------------|----------------------------------------------------------------------------------------------------------------------|-----|
|  | France | April 1, 2019 – May 31, 2019 | April 1, 2020 – May 31, 2020 | Miscellaneous* | University Hospital and Godinot Cancer Institute in Reims, Cancer Coordination Center (3C), Pasteur Hospital, Colmar | 9.5 |
|--|--------|------------------------------|------------------------------|----------------|----------------------------------------------------------------------------------------------------------------------|-----|

\*Observations with impute number of daily events in order to calculate the weighted variation.

**Supplementary Figure 1** Representation of geographic areas of the studies included in the analysis for cancer treatment variation

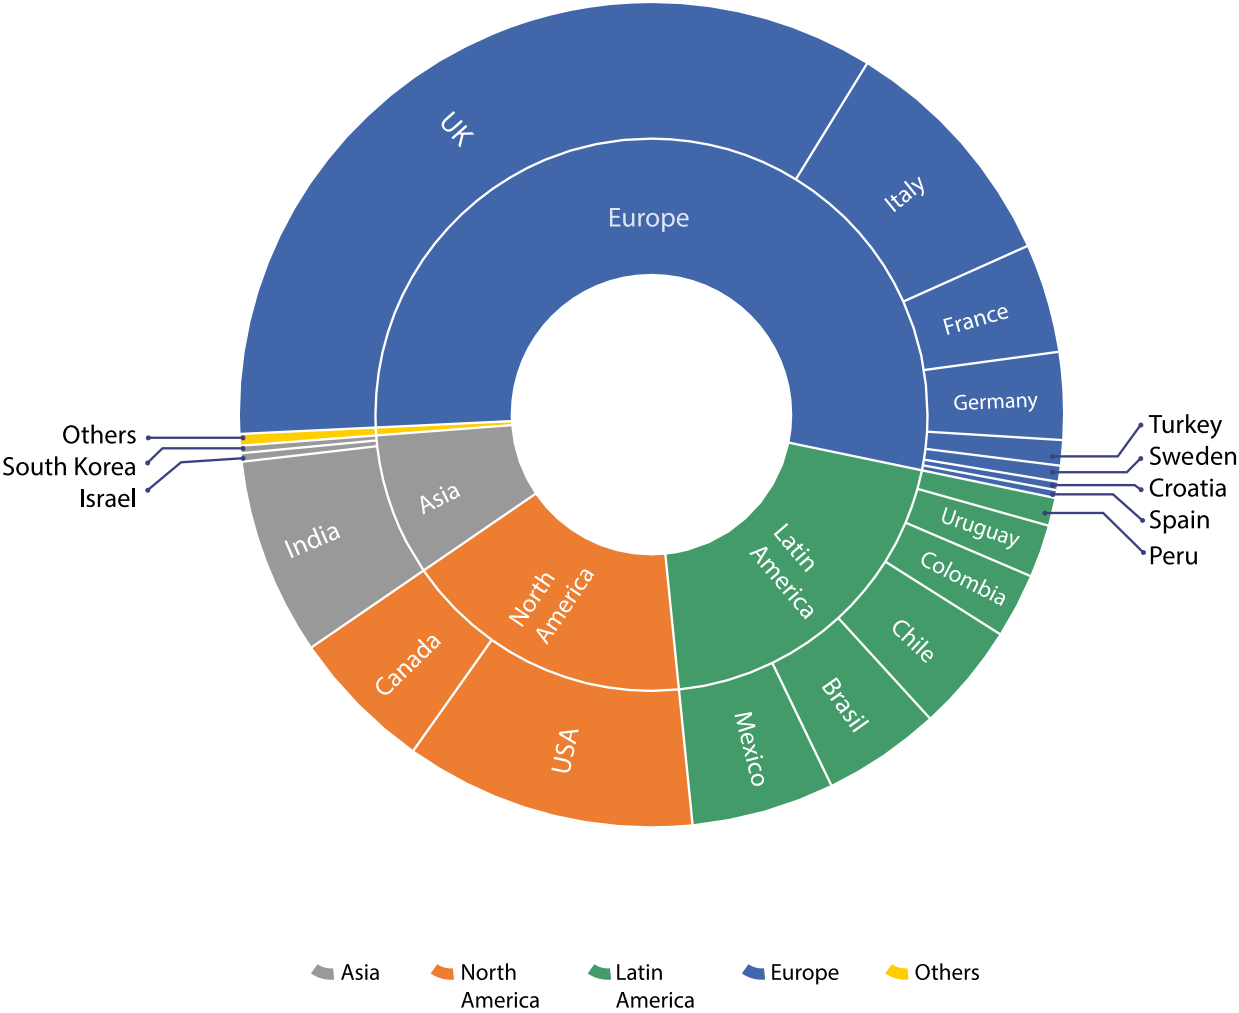



## References

1. Ak N, Vatansever S. "Door to Treatment" Outcomes of Cancer Patients during the COVID-19 Pandemic. *Chemotherapy*. 2020;65(5–6):141–6.
2. Karacin C, Acar R, Bal O, Eren T, Sendur MAN, Acikgoz Y, et al. "Swords and Shields" against COVID-19 for patients with cancer at "clean" and "pandemic" hospitals: are we ready for the second wave? *Support Care Cancer Off J Multinatl Assoc Support Care Cancer*. 2021 Aug;29(8):4587–93.
3. Raj Kumar B, Pandey D, Rohila J, deSouza A, Saklani A. An observational study of the demographic and treatment changes in a tertiary colorectal cancer center during the COVID-19 pandemic. *J Surg Oncol*. 2020 Dec;122(7):1271–5.
4. Gazivoda V, Greenbaum A, Roshal J, Lee J, Reddy L, Rehman S, et al. Assessing the immediate impact of COVID-19 on surgical oncology practice: Experience from an NCI-designated Comprehensive Cancer Center in the Northeastern United States. *J Surg Oncol*. 2021 Jul;124(1):7–15.
5. Roberge D, Delouya G, Bohigas A, Michalowski S. Catching the Wave: Quantifying the Impact of COVID on Radiotherapy Delivery. *Curr Oncol Tor Ont*. 2020 Dec 25;28(1):152–8.
6. Challine A, Lazzati A, Katsahian S, Parc Y, Lefevre JH. Colorectal screening: We have not caught up. A surge of colorectal cancer after the coronavirus disease 2019 (COVID-19) pandemic? *Surgery*. 2021 Jul;170(1):349–50.
7. Allaix ME, Lo Secco G, Velluti F, De Paolis P, Arolfo S, Morino M. Colorectal surgery during the COVID-19 outbreak: do we need to change? *Updat Surg*. 2021 Feb;73(1):173–7.
8. Akhtar N, Rajan S, Chakrabarti D, Kumar V, Gupta S, Misra S, et al. Continuing cancer surgery through the first six months of the COVID-19 pandemic at an academic university hospital in India: A lower-middle-income country experience. *J Surg Oncol*. 2021 Apr;123(5):1177–87.
9. Cadili L, DeGirolamo K, McKeivitt E, Brown CJ, Prabhakar C, Pao JS, et al. COVID-19 and breast cancer at a Regional Breast Centre: our flexible approach during the pandemic. *Breast Cancer Res Treat*. 2021 Apr;186(2):519–25.
10. Ranganathan P, Sengar M, Chinnaswamy G, Agrawal G, Arumugham R, Bhatt R, et al. Impact of COVID-19 on cancer care in India: a cohort study. *Lancet Oncol*. 2021 Jul;22(7):970–6.
11. Patt D, Gordan L, Diaz M, Okon T, Grady L, Harmison M, et al. Impact of COVID-19 on Cancer Care: How the Pandemic Is Delaying Cancer Diagnosis and Treatment for American Seniors. *JCO Clin Cancer Inform*. 2020 Nov;4:1059–71.
12. Martelli AJ, Machado RA, Pereira WM, Silveira DMM, da Cruz Perez DE, Martelli Júnior H. Impact of the COVID-19 pandemic in the head and neck cancer treatment in the Brazil. *Oral Oncol*. 2021 May;116:105148.
13. Castillo C, Camejo N, Amarillo D, Rodriguez F, Vituriera F, Krygier G, et al. Impact of the COVID-19 pandemic on health care activities at a Uruguayan mastology unit. *J Cancer Res Ther*. 2021 Jun;17(2):547–50.
14. Medas F, Ansaldo GL, Avenia N, Basili G, Bononi M, Bove A, et al. Impact of the COVID-19 pandemic on surgery for thyroid cancer in Italy: nationwide retrospective study. *Br J Surg*. 2021 Apr 30;108(4):e166–7.

15. Morris EJA, Goldacre R, Spata E, Mafham M, Finan PJ, Shelton J, et al. Impact of the COVID-19 pandemic on the detection and management of colorectal cancer in England: a population-based study. *Lancet Gastroenterol Hepatol*. 2021 Mar;6(3):199–208.
16. Furnari M, Eusebi LH, Savarino E, Petruzzellis C, Esposito G, Maida M, et al. Effects of SARS-CoV-2 emergency measures on high-risk lesions detection: a multicentre cross-sectional study. *Gut*. 2021 Jul;70(7):1241–3.
17. Diers J, Acar L, Baum P, Flemming S, Kastner C, Germer CT, et al. Fewer Operations for Cancer in Germany During the First Wave of COVID-19 in 2020—A Cohort Study and Time-Series Analysis. *Dtsch Arzteblatt Int*. 2021 Jul 12;118(27–28):481–2.
18. Lázaro Del Campo P, Ramírez López A, de la Cruz Benito B, de Paz Arias R, de Soto Álvarez T, Sánchez Vadillo I, et al. Hematopoietic cell transplantation during COVID-19 pandemic: experience from a tertiary hospital in Madrid. *Expert Rev Hematol*. 2021 Jan;14(1):1–5.
19. Pikkil YY, Duek OS, Ben Naftali Y, Link Y, Khayr M, Ullmann Y. Hidden in plain sight: the (other) danger of COVID-19. *Melanoma Res*. 2021 Aug 1;31(4):389–92.
20. Leite FPM, Curi C, Sanches SM, Curado MP, Fernandes GA, Moraes S, et al. How to maintain elective treatment of breast cancer during the COVID-19 pandemic-A cancer center experience. *J Surg Oncol*. 2021 Jan;123(1):9–11.
21. Vissio E, Falco EC, Collemi G, Borella F, Papotti M, Scarmozzino A, et al. Impact of COVID-19 lockdown measures on oncological surgical activity: Analysis of the surgical pathology caseload of a tertiary referral hospital in Northwestern Italy. *J Surg Oncol*. 2021 Jan;123(1):24–31.
22. Bravo JC, Navarro R, Rojas P, Hinrichs L, Schalper M, Zuñiga A, et al. Is Uro-oncological Surgery Safe During the COVID-19 Pandemic? Comparative Morbidity and Mortality in Patients Undergoing Surgery 2019-2020. *Urol J*. 2021 May 1;18(3):355–7.
23. Merchant J, Lindsey I, James D, Symons N, Boyce S, Jones O, et al. Maintaining Standards in Colorectal Cancer Surgery During the Global Pandemic: A Cohort Study. *World J Surg*. 2021 Mar;45(3):655–61.
24. Maspero M, Mazzola M, Bertoglio CL, Crippa J, Morini L, Magistro C, et al. Major cancer surgery during the coronavirus pandemic: experience from a tertiary referral center and COVID-19 hub in Northern Italy. *Br J Surg*. 2020 Sep;107(10):e440–1.
25. Penel N, Hammoudi A, Marliot G, De Courreges A, Cucchi M, Mirabel X, et al. Major impact of COVID-19 national containment on activities in the French northern comprehensive cancer center. *Med Oncol Northwood Lond Engl*. 2021 Feb 17;38(3):28.
26. S S, Sa H, M SK. Managing cancer during COVID pandemic - Experience of a tertiary cancer care center. *Eur J Surg Oncol J Eur Soc Surg Oncol Br Assoc Surg Oncol* [Internet]. 2021 May [cited 2022 Jul 21];47(5). Available from: <https://pubmed.ncbi.nlm.nih.gov/33039295/>
27. Franceschini G, Sanchez AM, Scardina L, Terribile D, Franco A, D'Archi S, et al. Mastectomy with immediate breast reconstruction during “phase 1” COVID-19 emergency: An Italian experience. *Breast J*. 2021 Jan;27(1):80–1.
28. Palluzzi E, Corrado G, Marchetti C, Bolomini G, Vertechy L, Bottoni C, et al. Medical treatment of patients with gynecologic cancer during the COVID-19 pandemic. *Int J Gynecol Cancer Off J Int Gynecol Cancer Soc*. 2021 Aug;31(8):1154–8.

29. Bertolaccini L, Sedda G, Spaggiari L. Paying Another Tribute to the COVID-19 Pandemic: The Decrease of Early Lung Cancers. *Ann Thorac Surg*. 2021 Mar;111(3):745–6.
30. Rich H, Jones B, Malin I, Hemington-Gorse SJ, Cubitt JJ. Plastic surgical management of skin cancer patients during the COVID-19 pandemic. *J Plast Reconstr Aesthetic Surg JPRAS*. 2021 Mar;74(3):644–710.
31. Fallara G, Sandin F, Styrke J, Carlsson S, Lissbrant IF, Ahlgren J, et al. Prostate cancer diagnosis, staging, and treatment in Sweden during the first phase of the COVID-19 pandemic. *Scand J Urol*. 2021 Jun;55(3):184–91.
32. Montesi G, Di Biase S, Chierchini S, Pavanato G, Virdis GE, Contato E, et al. Radiotherapy during COVID-19 pandemic. How to create a No fly zone: a Northern Italy experience. *Radiol Med (Torino)*. 2020 Jun;125(6):600–3.
33. Gonnelli A, Montrone S, Cocuzza P, Ursino S, Manfredi B, Mattioni R, et al. Radiotherapy in the COVID-19 Pandemic Era. *Vivo Athens Greece*. 2020 Dec;34(6):3731–4.
34. Schiavone D, Torresan F, Rossi GP, Iacobone M. Reduced adrenal surgery in COVID-19 pandemic: a possible ticking time bomb. *Br J Surg*. 2021 Jul 23;108(7):e239–40.
35. Roseleur J, Gonzalez-Chica DA, Emery J, Stocks NP. Skin checks and skin cancer diagnosis in Australian general practice before and during the COVID-19 pandemic, 2011-2020. *Br J Dermatol*. 2021 Oct;185(4):853–5.
36. Gathani T, Clayton G, MacInnes E, Horgan K. The COVID-19 pandemic and impact on breast cancer diagnoses: what happened in England in the first half of 2020. *Br J Cancer*. 2021 Feb;124(4):710–2.
37. Clark JJ, Dwyer D, Pinwill N, Clark P, Johnson P, Hackshaw A. The effect of clinical decision making for initiation of systemic anticancer treatments in response to the COVID-19 pandemic in England: a retrospective analysis. *Lancet Oncol*. 2021 Jan;22(1):66–73.
38. Spencer K, Jones CM, Girdler R, Roe C, Sharpe M, Lawton S, et al. The impact of the COVID-19 pandemic on radiotherapy services in England, UK: a population-based study. *Lancet Oncol*. 2021 Mar;22(3):309–20.
39. Kvolik Pavić A, Zubčić V, Kvolik S. Workload changes during the COVID-19 pandemic and effects on the flow of cancer patients in the Maxillofacial Surgery Department. *Med Glas Off Publ Med Assoc Zenica-Doboj Cant Bosnia Herzeg*. 2021 Feb 1;18(1):133–7.
40. Perrone AM, Dondi G, Giunchi S, De Crescenzo E, Boussedra S, Tesei M, et al. COVID-19 free oncologic surgical hub: The experience of reallocation of a gynecologic oncology unit during pandemic outbreak. *Gynecol Oncol*. 2021 Apr;161(1):89–96.
41. Danesh MJ, Porter M, Brag K, Salian P, Olbricht S. COVID-19 impacts on dermatologic surgery patients: A single institution experience. *J Am Acad Dermatol*. 2021 Jun;84(6):1698–9.
42. Lee S, Heo J. COVID-19 pandemic: a new cause of unplanned interruption of radiotherapy in breast cancer patients. *Med Oncol Northwood Lond Engl*. 2021 Nov 5;39(1):5.
43. Giuliani J, Bonetti A. COVID-19 and cancer: A clear change not only in daily clinical practice but also in clinical research management. *J Med Virol*. 2021 May;93(5):2564–5.

44. Meggetto O, Jembere N, Gao J, Walker MJ, Rey M, Rabeneck L, et al. The impact of the COVID-19 pandemic on the Ontario Cervical Screening Program, colposcopy and treatment services in Ontario, Canada: a population-based study. *BJOG Int J Obstet Gynaecol*. 2021 Aug;128(9):1503–10.
45. Vázquez Rosas T, Cazap E, Delgado L, Ismael J, Bejarano S, Castro C, et al. Social Distancing and Economic Crisis During COVID-19 Pandemic Reduced Cancer Control in Latin America and Will Result in Increased Late-Stage Diagnoses and Expense. *JCO Glob Oncol*. 2021 May;7:694–703.
46. Fonseca GA, Normando PG, Loureiro LVM, Rodrigues REF, Oliveira VA, Melo MDT, et al. Reduction in the Number of Procedures and Hospitalizations and Increase in Cancer Mortality During the COVID-19 Pandemic in Brazil. *JCO Glob Oncol*. 2021 Jan;7:4–9.
47. Brugel M, Carlier C, Essner C, Debreuve-Theresette A, Beck MF, Merrouche Y, et al. Dramatic Changes in Oncology Care Pathways During the COVID-19 Pandemic: The French ONCOCARE-COV Study. *The Oncologist*. 2021 Feb;26(2):e338–41.
